# Supplementary material for: Maternal immune activation induces sustained changes in fetal microglia motility
Source: PubMed Central journal article supplement (PMC7721716; doi:10.1038/s41598-020-78294-2), 2020-12-07
Supplement: 41598_2020_78294_MOESM3_ESM.pdf [file 41598_2020_78294_MOESM3_ESM.pdf]

a

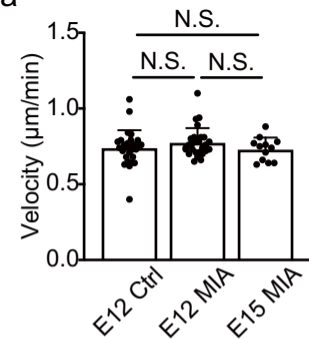

b

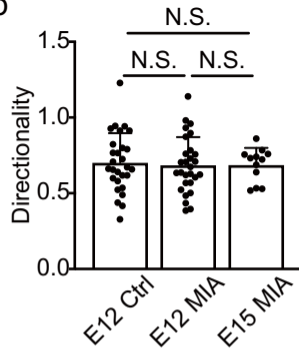

Averaged data for microglial tip velocity **(a)** and directionality **(b)** imaged *in vivo* from P42 mice offspring following injection of saline at E12 (E12 Ctrl) or Poly(I:C) at E12 (E12 MIA) or E15 (E15 MIA). Imaging was done under basal conditions (i.e. without LPS, cf. Figure 3 in main text). E12 saline and Poly(I:C) -injected mice;  $n = 28$  cells from 8 mice in each group; E15 Poly(I:C) -injected mice;  $n = 12$  cells from 4 mice.

N.S.: not significant, one-way ANOVA.
