# Supplementary material for: Maternal immune activation induces sustained changes in fetal microglia motility
Source: PubMed Central journal article supplement (PMC7721716; doi:10.1038/s41598-020-78294-2), 2020-12-07
Supplement: 41598_2020_78294_MOESM4_ESM.pdf [file 41598_2020_78294_MOESM4_ESM.pdf]

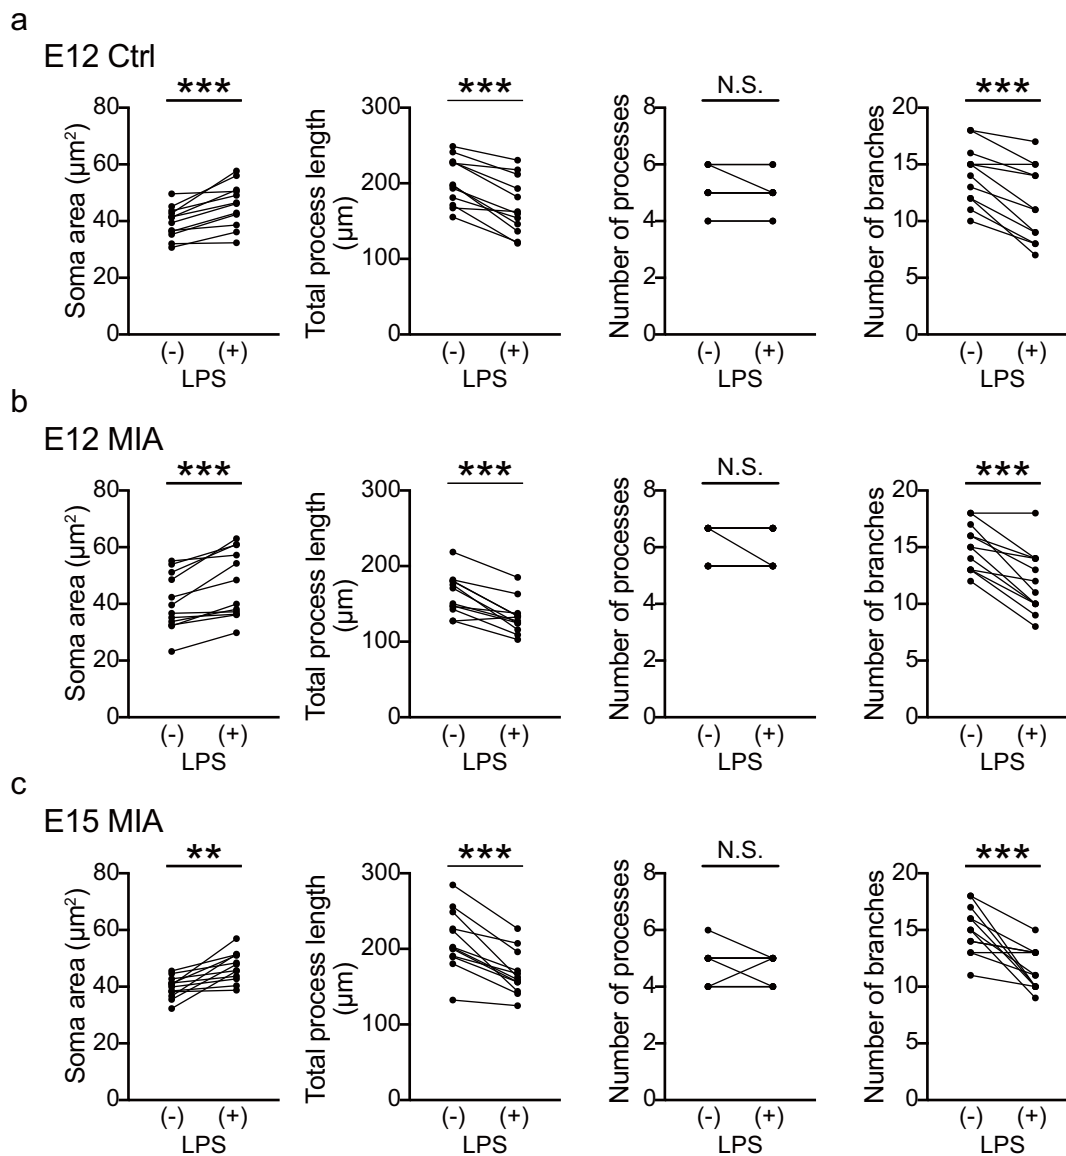

Effects of Lipopolysaccharide (LPS) on microglial morphological parameters in P42 mice brains, previously injected with saline (Ctrl) or Poly (I:C) (MIA) at E12 or E15. In each panel, data comes from 12 cells from 4 mice in each group, with microglia located 100–200  $\mu\text{m}$  depth below the brain surface.

Each point represents data from a single cell, with lines connecting data before and after LPS in that cell.

\*\* $P < 0.01$ , \*\*\* $P < 0.001$  and N.S.: not significant, unpaired  $t$ -test.
